# Supplementary material
Source: publisher site journal article supplement (https://www.spandidos-publications.com/2500/downloadSupplementary)
Supplement: Supplementary file 1 [file downloadSupplementary]

## Sheet: 通路DEmRNA
Table SII. Differentially expressed mRNAs enriched in the 'proteoglycans in cancer' pathway.
ID	Gene ID	Name
1	287	ANK2
2	5579	PRKCB
3	27250	PDCD4
4	7422	VEGFA
5	51196	PLCE1
6	4660	PPP1R12B
7	857	CAV1
8	355	FAS
9	4609	MYC
10	7482	WNT2B
11	7023	TFAP4
12	2247	FGF2
13	5336	PLCG2
14	288	ANK3
15	7472	WNT2
16	2549	GAB1
17	7074	TIAM1
18	7483	WNT9A
19	960	CD44
20	2318	FLNC
21	5567	PRKACB
22	3708	ITPR1
23	7473	WNT3
24	817	CAMK2D
25	4233	MET
26	6469	SHH
27	595	CCND1
28	6548	SLC9A1
29	5335	PLCG1
30	10855	HPSE
31	3690	ITGB3
32	8322	FZD4
33	7409	VAV1
34	2316	FLNA
35	1026	CDKN1A
36	5328	PLAU
37	1634	DCN
38	117581	TWIST2
39	1277	COL1A1
40	2260	FGFR1
41	10000	AKT3
42	5293	PIK3CD
43	3059	HCLS1
